# Supplementary material for: Scrub Typhus Outbreak, Northern Thailand, 2006–2007
Source: PubMed Central journal article supplement (PMC3647508; doi:10.3201/eid1905.121445), 2013-05
Supplement: 12-1445-Techapp-s1.pdf [file 12-1445-Techapp-s1.pdf]

# Scrub Typhus Outbreak, Northern Thailand, 2006–2007

## Technical Appendix

Technical Appendix Table. Clinical manifestations and laboratory test results for 26 scrub typhus–infected children from Ban Pongyaeng, Thailand, who were hospitalized during June 2006–May 2007\*

| Patient no. | Sex, age | Signs and symptoms |        |          |       |      | Test results for <i>Orientia tsutsugamushi</i> |                     |                    |                     | Isolation |
|-------------|----------|--------------------|--------|----------|-------|------|------------------------------------------------|---------------------|--------------------|---------------------|-----------|
|             |          |                    |        |          |       |      | IFA, IgM, IgG titer                            |                     | PCR                |                     |           |
|             |          | Fever              | Eschar | Headache | Chill | Rash | First serum sample                             | Second serum sample | First blood sample | Second blood sample |           |
| P01         | F, 2 y   | +                  | +      | –        | +     | –    | 400, 400                                       | 800, 800            | +                  | –                   | + (PYH1)  |
| P02         | M, 4 y   | +                  | +      | +        | +     | –    | 200, 50                                        | 400, 400            | +                  | –                   | –         |
| P03         | F, 8 y   | +                  | +      | +        | +     | –    | 400, 50                                        | 800, 800            | +                  | –                   | –         |
| P04         | M, 9 y   | +                  | +      | +        | +     | –    | 800, 800                                       | 800, 800            | +                  | –                   | + (PYH4)  |
| P05         | F, 12 y  | +                  | –      | +        | +     | –    | 200, 100                                       | 400, 800            | +                  | –                   | –         |
| P06         | F, 7 y   | +                  | +      | +        | –     | –    | 50, Neg                                        | 400, 400            | +                  | +                   | –         |
| P07         | M, 11 m  | +                  | +      | –        | +     | –    | 1600, 1600                                     | 1600, 1600          | +                  | +                   | –         |
| P08         | M, 2 y   | +                  | +      | –        | +     | –    | 50, 800                                        | 100, 1600           | +                  | –                   | ND        |
| P09         | M, 5 y   | +                  | +      | –        | +     | +    | Neg, Neg                                       | 50, 50              | +                  | –                   | ND        |
| P10         | M, 1 y   | +                  | +      | –        | –     | +    | Neg, Neg                                       | Neg, Neg            | +                  | –                   | ND        |
| P11         | F, 9 y   | +                  | +      | +        | +     | +    | 400, 800                                       | 400, 800            | –                  | –                   | ND        |
| P12         | M, 12 y  | +                  | –      | +        | +     | –    | Neg, Neg                                       | Neg, Neg            | +                  | ND                  | ND        |
| P13         | M, 3 y   | +                  | –      | –        | –     | –    | Neg, Neg                                       | 100, 100            | +                  | +                   | ND        |
| P14         | M, 13 y  | +                  | –      | +        | +     | –    | 1600, 1600                                     | 1600, 1600          | +                  | –                   | ND        |
| P15         | M, 5 y   | +                  | –      | +        | +     | –    | 1600, 800                                      | 1600, 800           | +                  | +                   | ND        |
| P16         | M, 1 y   | +                  | +      | –        | +     | –    | 400, 400                                       | ND                  | –                  | ND                  | ND        |
| P17         | M, 9 y   | +                  | +      | +        | +     | –    | 50, 400                                        | 50, 400             | +                  | –                   | ND        |
| P18         | M, 1 y   | +                  | +      | –        | +     | +    | Neg, Neg                                       | 400, 400            | –                  | –                   | ND        |
| P19         | M, 6 y   | +                  | +      | +        | +     | –    | 400, 800                                       | 3200, 3200          | +                  | +                   | ND        |
| P20         | M, 7 y   | +                  | +      | +        | +     | +    | 50, 50                                         | 800, 400            | +                  | –                   | ND        |
| P21         | M, 1 y   | +                  | –      | –        | –     | –    | 400, 200                                       | 1600, 800           | +                  | +                   | ND        |
| P22         | F, 5 y   | +                  | +      | +        | –     | +    | 400, 400                                       | ND                  | +                  | ND                  | ND        |
| P23         | F, 2 y   | +                  | –      | –        | +     | –    | 1600, 800                                      | 3200, 800           | +                  | –                   | ND        |
| P24         | M, 6 y   | +                  | +      | +        | +     | –    | 200, 50                                        | 400, 50             | +                  | ND                  | ND        |
| P25         | F, 1 y   | +                  | +      | –        | –     | –    | 1600, 200                                      | ND                  | +                  | ND                  | ND        |
| P26         | M, 13 y  | +                  | +      | +        | –     | –    | Neg, Neg                                       | ND                  | +                  | ND                  | ND        |

\*IFA, indirect fluorescence antibody assay; Neg, negative; ND, not done.
